# Supplementary material
Source: Elsevier journal article supplement (https://www.sciencedirect.com/science/article/pii/S0210480616302017)
Supplement: mmc1 [file S0210480616302017:mmc1.pdf]

### Encuesta 1. ACTIVIDAD MEDICO QUIRÚRGICA DURANTE LA RESIDENCIA DE UROLOGÍA EN ESPAÑA.

- 1) ¿Actualmente qué año de residencia estas cursando?
  - a. 1
  - b. 2
  - c. 3
  - d. 4
  - e. 5
  
- 2) ¿En cuál comunidad autónoma estas realizando la residencia?
  
- 3) ¿Cuántos adjuntos (miembros del Staff) hay en tu servicio?
  - a. 1-5
  - b. 5-10
  - c. 10-15
  - d. Más de 15
  
- 4) ¿Cuántas horas a la semana estás en el hospital aproximadamente (Actividad diaria, tardes, quirófanos, actividad investigadora)? NO INCLUIR GUARDIAS
  - a. 0-30
  - b. 30 – 50
  - c. 50 -80
  - d. 80 -100
  - e. Más de 100
  
- 5) ¿Cuántas guardias haces al mes?
  - a. 0
  - b. 1-3
  - c. 3-5
  - d. 6-7
  - e. 8 o mas
  
- 6) ¿Tienes adjunto de presencia física en las guardias?
  - a. Si
  - b. No
  
- 7) ¿**Sueles** librar tras una guardia?
  - a. Siempre.

- b. Habitualmente.
  - c. Pocas veces.
  - d. No, casi nunca.
- 8) ¿Cuántas horas crees que inviertes a la semana en trabajo fuera de quirófano (redacción de informes de alta, atención a pacientes de planta de hospitalización, hojas de interconsulta, atención de llamadas de urgencias)?
- a. 1-10
  - b. 11-20
  - c. 21-30
  - d. 31-40
  - e. Más de 40
- 9) ¿Cuántas horas a la semana crees que inviertes en quirófano?
- a. 1-10
  - b. 11-20
  - c. 21-30
  - d. 31-40
  - e. Más de 40
- 10) ¿Cuántas horas a la semana estas en quirófano como ayudante?
- a. 1-10
  - b. 11-20
  - c. 21-30
  - d. 31-40
  - e. Más de 40
- 11) ¿Cuántas horas estas en quirófano como cirujano principal durante la semana?
- a. 1-10
  - b. 11-20
  - c. 21-30
  - d. 31-40
  - e. Más de 40
- 12) ¿Cuántas RTU (Vejiga/Próstata) has realizado como cirujano principal aproximadamente?
- a. 1-10
  - b. 10-30
  - c. 30-50
  - d. 50-100
  - e. Ninguna

- 13) ¿Cuántas adenomectomías prostáticas abiertas has realizado como cirujano principal?
- a. 0
  - b. 1-10
  - c. 10-30
  - d. 30 -50
  - e. Más de 50
- 14) ¿Cuántos procedimientos con láser para tratamiento HBP como cirujano has realizado?
- a. 0
  - b. 1-10
  - c. 10-30
  - d. Más de 30
- 15) ¿Cuántas prostatectomías radicales abiertas has realizado como cirujano principal?
- a. 0
  - b. 1-5
  - c. 5-10
  - d. 10-20
  - e. Más de 20
- 16) ¿Cuántas prostatectomías laparoscópicas has realizado como cirujano principal?
- a. 0
  - b. 1-10
  - c. 10-20
  - d. Más de 20
- 17) ¿En cuántas prostatectomías radicales laparoscópicas has participado como 1er ayudante?
- a. 0
  - b. 1-10
  - c. 10-20
  - d. 20 -40
  - e. Más de 40
- 18) ¿Cuántas nefrectomías laparoscópicas has realizado como cirujano principal?
- a. 0
  - b. 1-5
  - c. 5-10
  - d. 10-30
  - e. Más de 30

19) ¿Cuántas nefrectomías abiertas has realizado como cirujano principal?

- a. 0
- b. 1-5
- c. 5-10
- d. 10-30
- e. Más de 30

20) ¿En Cuantas nefrectomías abiertas has participado como 1er ayudante?

- a. 0
- b. 1-10
- c. 10-20
- d. Más de 20

21) ¿Cuántas cistectomías radicales has realizado como cirujano principal?

- a. 0
- b. 1-5
- c. 5-10
- d. 10-20
- e. Más de 20.

22) ¿En cuántas cistectomías radicales has participado como 1er ayudante?

- a. 0
- b. 1-10
- c. 10-20
- d. 20-40
- e. Más de 40

23) ¿Cuántas cistectomías radicales laparoscópicas has realizado como cirujano principal?

- a. 0
- b. 1-5
- c. 5-10
- d. 10-20
- e. Más de 20.

24) ¿En cuántas cistectomías radicales laparoscópicas has participado como 1er ayudante?

- a. 0
- b. 1-10
- c. 10-20
- d. 20-40
- e. Más de 40

## **Encuesta 2. ESTADO ACTUAL DE LA FORMACIÓN DE LOS RESIDENTES DE UROLOGIA.**

- 1) ¿Actualmente qué año de residencia estas cursando?
  - a. 1
  - b. 2
  - c. 3
  - d. 4
  - e. 5
  
- 2) ¿En cuál comunidad autónoma estas realizando la residencia?
  
- 3) ¿Te sientes seguro de realizar una agenda de consulta de urología general sin la tutela de un adjunto?
  - a. Si
  - b. No
  
- 4) ¿Te sientes seguro de realizar una agenda de especialidad sin la tutela de un adjunto? (Andrología, Oncología, Litiasis)
  - a. Si
  - b. No
  
- 5) ¿Cuántas veces al mes realizas actividad de consulta?
  - a. 0
  - b. 1-3
  - c. 3-5
  - d. 5-8
  - e. Más de 8
  
- 6) ¿Cuáles de los siguientes procedimientos sientes capaz de realizar de forma segura sin la presencia de un adjunto? SELECCIÓN MULTIPLE
  - a. Vasectomía, circuncisión.
  - b. Hidrocele, orquiectomía.
  - c. Colocación de catéter JJ.
  - d. Todos
  - e. Ninguno
  
- 7) ¿Cuál de los siguientes procedimientos te sientes seguro de realizar de forma autónoma? SELECCIÓN MULTIPLE
  - a. Adenomectomía prostática
  - b. RTU vejiga/próstata

- c. Laser de próstata
- d. Todos
- e. Ninguno

8) ¿Te sientes capaz de realizar las siguientes intervenciones de forma autónoma?

SELECCIÓN MÚLTIPLE

- a. Uretroplastia
- b. Tratamiento de incontinencia femenina: TOT
- c. Tratamiento de incontinencia masculina: ATOMS/Slim Suburetral /Esfínter artificial
- d. Impotencia masculina: Prótesis de Pene
- e. Todos
- f. Ninguno

9) ¿Te sientes capacitado para realizar las siguientes intervenciones sin la presencia de un adjunto con experiencia? SELECCIÓN MULTIPLE

- a. Prostatectomía radical abierta
- b. Prostatectomía radical laparoscópica
- c. Todos
- d. Ninguno

10) ¿Cuáles de las siguientes intervenciones te sientes capacitado para realizar de forma autónoma? SELECCIÓN MULTIPLE

- a. Nefrectomía abierta
- b. Nefrectomía laparoscópica
- c. Suprarrenelectomía abierta
- d. Suprarrenelectomía laparoscópica
- e. Pieloplastia abierta
- f. Pieloplastia laparoscópica
- g. Todos
- h. Ninguno

11) ¿Te sientes capacitado para realizar las siguientes intervenciones de forma autónoma?

SELECCIÓN MULTIPLE

- 1. Cistectomía radical abierta
- 2. Cistectomía radical laparoscópica
- 3. Flap de Boari o Vejiga Psoica
- 4. Todos
- 5. Ninguno

12) ¿Te sientes seguro de realizar alguno de los siguientes procedimientos sin adjunto?

SELECCIÓN MULTIPLE

- 1. RIRS

2. Nefrolitotomía percutánea
3. URS rígida
4. Todos
5. Ninguno

13) ¿Donde entrenas laparoscopia?

1. En casa
2. En el hospital
3. Ambos
4. No entreno.

14) ¿Cuántas horas entrenas a la semana laparoscopia?

- a. 0
- b. 1-10
- c. 10-20
- d. 30-40
- e. Más de 40

15) ¿Cuenta tu hospital con laboratorio o medios de entrenamiento para alguno de los siguientes procedimientos? SELECCIÓN MULTIPLE

1. RTU
2. Laser
3. Laparoscopia
4. Robótica
5. Endourología/Tratamiento de litiasis (RIRS, Nefrolitotomía percutánea)
6. Todos
7. No cuenta con ninguno

16) ¿Con que tipo de medios de entrenamiento cuenta tu hospital a tu disposición? (Selección múltiple)

1. Modelos animales (Animalario)
2. Cajas de entrenamiento laparoscópico ("Pelvic Training")
3. Modelos virtuales (Endourología, Laser, RTU, Robótica, otros)
4. Todos
5. Ninguno

17) ¿Cuál es tu satisfacción con tu formación quirúrgica?

1. Encantado
2. Muy Satisfecho
3. Satisfecho
4. Insatisfecho
5. Muy Insatisfecho

18) En orden de importancia ¿cuáles crees que son las razones por las que los residentes no cuentan con todas las oportunidades quirúrgicas que desean durante su formación durante la residencia? SELECCIÓN MULTIPLE

- a. Tutor de residentes (No velar porque los residentes sean responsables de un número determinado de procedimientos según niveles de responsabilidad)
- b. Adjuntos del Servicio desarrollando su curva de aprendizaje
- c. Falta de interés de los residentes.
- d. Poca variedad o volumen de Procedimientos en el hospital.
- e. Ministerio de Sanidad (No supervisión rigurosa del cumplimiento del programa oficial de formación de la especialidad según niveles de responsabilidad)
- f. Asociación Española de Urología (Falta de implicación en la supervisión del cumplimiento del número de procedimientos realizados por los residentes en cada hospital según Nivel de responsabilidad)

19) ¿Has realizado cursos de entrenamiento de laparoscópica/Robótica de forma práctica en centros certificados?

- a. Si
- b. No

20) ¿Has realizado cursos prácticos de RIRS/Endourología Percutánea?

- a. Si
- b. No

21) ¿Has realizado cursos prácticos de formación en Robótica?

- a. Si
- b. No



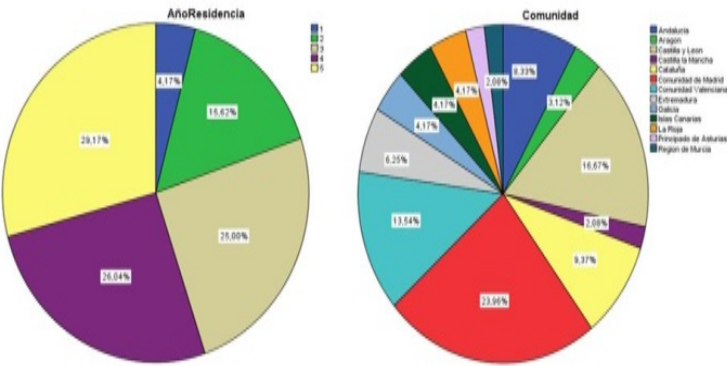

[illegible]

|                 |   |   |    |   |   |    |    |   |   |   |   |   |   |    |       |
|-----------------|---|---|----|---|---|----|----|---|---|---|---|---|---|----|-------|
| PR Lap          |   |   |    |   |   |    |    |   |   |   |   |   |   |    |       |
| 0               | 8 | 3 | 16 | 1 | 9 | 19 | 13 | 6 | 1 | 4 | 4 | 2 | 2 | 88 | 91.7  |
| 1 - 5           | 0 | 0 | 0  | 1 | 0 | 2  | 1  | 0 | 1 | 0 | 0 | 0 | 0 | 5  | 5.2   |
| 10 - 20         | 0 | 0 | 0  | 0 | 0 | 1  | 0  | 0 | 2 | 0 | 0 | 0 | 0 | 3  | 3.1   |
| >20             | 0 | 0 | 0  | 0 | 0 | 0  | 0  | 0 | 0 | 0 | 0 | 0 | 0 | 0  | 0     |
| Nefrectomía Lap |   |   |    |   |   |    |    |   |   |   |   |   |   |    |       |
| 0               | 7 | 1 | 14 | 1 | 7 | 13 | 11 | 6 | 2 | 4 | 4 | 1 | 2 | 73 | 76.04 |
| 1 – 5           | 1 | 2 | 1  | 0 | 2 | 7  | 3  | 0 | 2 | 0 | 0 | 0 | 0 | 18 | 18.75 |
| 5 – 10          | 0 | 0 | 1  | 1 | 0 | 0  | 0  | 0 | 0 | 0 | 0 | 1 | 0 | 3  | 3.12  |
| 10 - 20         | 0 | 0 | 0  | 0 | 0 | 2  | 0  | 0 | 0 | 0 | 0 | 0 | 0 | 2  | 2.08  |
| >20             | 0 | 0 | 0  | 0 | 0 | 0  | 0  | 0 | 0 | 0 | 0 | 0 | 0 | 0  | 0     |
| Cistectomía Lap |   |   |    |   |   |    |    |   |   |   |   |   |   |    |       |
| 0               | 8 | 3 | 16 | 2 | 9 | 22 | 13 | 6 | 3 | 4 | 4 | 2 | 2 | 94 | 97.99 |
| 1 - 10          | 0 | 0 | 0  | 0 | 0 | 0  | 0  | 0 | 1 | 0 | 0 | 0 | 0 | 1  | 1.04  |
| VP              | 0 | 0 | 0  | 0 | 0 | 0  | 0  | 0 | 0 | 0 | 0 | 0 | 0 | 1  | 1.04  |

n= 96

Apéndice 4. Razones por las que los MIR no cuentan con oportunidad

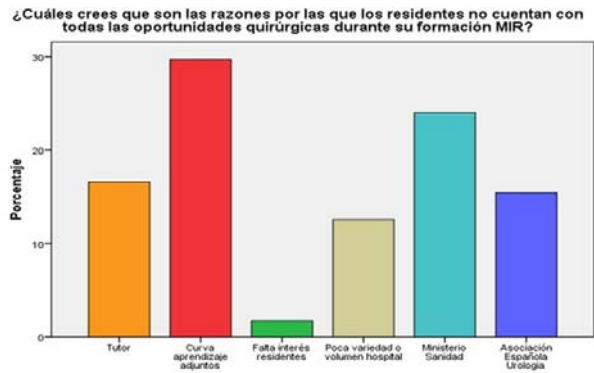

**Apéndice 5.** Satisfacción con la residencia de Urología en España.

| Escala |                  | Frecuencia | Porcentaje |
|--------|------------------|------------|------------|
| 5      | Encantado        | 3          | 1.84       |
| 4      | Muy Satisfecho   | 15         | 9.2        |
| 3      | Satisfecho       | 72         | 44.17      |
| 2      | Insatisfecho     | 64         | 39.26      |
| 1      | Muy insatisfecho | 9          | 5.52       |

n = 163
